# Supplementary material
Source: MDPI journal article supplement (https://www.mdpi.com/2077-1312/8/9/638)
Supplement: s1 [file s1]

Archive with 2 entries (2 files):
- Supplemental Figures S1 to S7.pdf
- Supplemental Table S1.pdf
