# Supplementary material
Source: MDPI journal article supplement (https://www.mdpi.com/2077-1312/8/9/638)
Supplement: s1 [file s1]

Supplemental Table S1. 16S rRNA nucleotide sequences.

| Lab code | Nucleotide sequence (5' → 3')                                                                                                                                                                                                                                                                                                                                                                                                                                                                                                                                                                                                                                                                                                                                                                                                                                                                                                                                                                                                                                                                 | Sequence length | GenBank Acc. No.                         |
|----------|-----------------------------------------------------------------------------------------------------------------------------------------------------------------------------------------------------------------------------------------------------------------------------------------------------------------------------------------------------------------------------------------------------------------------------------------------------------------------------------------------------------------------------------------------------------------------------------------------------------------------------------------------------------------------------------------------------------------------------------------------------------------------------------------------------------------------------------------------------------------------------------------------------------------------------------------------------------------------------------------------------------------------------------------------------------------------------------------------|-----------------|------------------------------------------|
| ITAC108  | >16S_ITAC_108<br>CGCAAGCCTGACGGAGCAACGCCGCGTGAGGGATGAAGCCCTCTGGGCTGTAAACCTCTTTTCTCAAGGAAGAAGAACTGACGGTACTTGAGGAATAAGCCACGGCTAATTCGCTGCCAGCAGCCGCGGTAATACGGGAGTGGCAAGCGT<br>TATCCGGAAATTATTGGGCGTAAAGCGTCCGCAGGCGGTCTTTGAAAGTCTGTTGTTAAAGCGTGAGAGCTCAACTCCATTTTCAGCAATGGAAACTAGAAAGCTAGAGTGTGGTAGGGGCAGAGGGAATTCCCGGTGTAGCGGTGAAATGCGT<br>AGATATCGGGAAGAACACCACTGAGTGGCGAAGGCGCTCTGCTGGGCCATAACTGACGCTCATGGACGAAAGCCAGGGGAGCGAAAGGGATTAGATACCCCCGTAGTCTTGGCCGTAACAGTGAACACTAGGTGTGCGGGGAATCGACCCCT<br>CGGTGTGCTAGGCAACGCGTTAAGTGTTCGCGCTGGGGAGTAGCGACGCAAGTGTGAAACTCAAAGGAATTGACGGGGGCCCGACAAGCGGTGGAGTATGTGTTTAATTTCGATGCAACGCGAAGAACCTTACGAAATTTCTGCGAAATTTCTGAGAAATCGGGAAGTGCCTTCGGGAGCGCAAGACAGGTGGTGCATGGCTGCTGCTGAGATGTTGGGTTAAGTCCCGCAACGAGCGCAACCCACGCTTTAGTTGCCAGCATTAAGTTGGGCACCTTA<br>GAGAGACCGCGGTGATAAACCGGAGGAAGGTGTGGATGACGTCAAGTCATCATGCCCTTACATCCTGGGCTACACAGCTACTACAATGCTACGGACAAAGGGCAGCAAACTCGCGAGAGCTAGCAAAATCCATAAACCGTGGCTCAGT<br>TCAGATCGTAGGCTGCAACTCGCTACGTGAAGGAGGAATCGCTAGTAATCGCAGGTGAGCATACTGCGGTGAATACGTTCCCGGGCCTT                                             | 990             | [SUB6417193]<br>16S_ITAC_108<br>MN581057 |
| ITAC107  | >16S_ITAC_107<br>AGGAGAGACTGACGGTACTTGAGGAATAAGCCCGGCTAATTCGCTGCCAGCAGCCGCGTAATACGGGAGTGGCAAGCGTTATCCGGAATTATTGGGCGTAAAGCGTCCGCAGGCGGCCAGTCAAGTCTGTTGTCAAAGCGTGGAGCTTA<br>ACTCCATTTGAGCAATGGAAGCTGATTGGCTTGAGTGTGGTAGGGGCAGAGGGGAATTCGCGGTGTAGCGGTGAAATGCGTAGATATCGGGAAGAACACCACTGAGTGGCAAGGCGCTCTGCTGGGCCATAACTGACGCTCATGGACGAAAGCC<br>AGGGGAGCGAAAGGGATTAGATACCCCTGTAGTCTGGCCGTAACGATGAACACTAGGTGTGCGGGGAATCGACCCCTCGGTGCTGAGCCAACGCGTTAAGTGTTCGCGCTGGGGAGTAGCGACGCAAGTGTGAACTCAAAGGAAT<br>TGACGGGGGGCCCGCACAAGCGGTGGAGTATGTGTTTAATTTCGATGCAACGCGAAGAACCTTACGAAATTTCTGCGAAATTTCTGAGAAATCGGGAAGTGCCTTCGGGAGCGCAAGACAGGTGGTGCATGGCTGTGCTGA<br>GCTCGTGTGCTGAGATGTTGGGTTAAGTCCCGCAACGAGCGCAACCCACGCTTTAGTTGCCAGCACTGAGTTGGGCACCTCTAGAGGACCGCCGCTGATAACCGGAGGAAGGTGTGGATGACGTCAAGTCATCATGCCCTTACATCCTGG<br>GCTACACAGTGTACAATGCTAGGGCAGAGGGCAGCAAAACCCGCGAGAGCTAGCAAATCCCAAAACCTGGCTCTTGTCAAATATAGGCTCAACGGGCCACTTTTATTTTAAACGCCCTAGTATTGCGGCTCAGCAACGGGTTTAGGTG<br>CCGCTTGTGGGCGCGGTTGGG                                                                                                         | 921             | [SUB6417174]<br>16S_ITAC_107<br>MN581056 |
| ITAC106  | >16S_ITAC_106<br>GCACCTTCTGTCTGCGAATCTAGCGATTCTCTACTTCCGCAGGCGAGTTGCAGCCTGCGATCTGAACTGGGATAGGGTTATGAGATTAGCGCGTCTTCGCGGATTGGCGACTCTTTGTCCCTACCATTGTAGTACGTGTGTAGCCCAGA<br>ACGTTAAGGGGATGATGACTTGACGCTGTCACACCTTCTCCGTTTGTGACCAGGCACTCTCTAGAGTGCCCAACTTAATGATGGCAACTAAAAACGTGGGTTGCGCTCGTTGCGGGACTTAACCCAACATCTCACGACAGAGCTGACGACA<br>ACGACAGCCATGCACCACCTGTGTTGCGCTCCCGAAGGCACCTCCTACTTTCATTGGGATTGCGGACATGTCAAGCCCTGGTAAGGTTCTTTCGCTTGATCGAATTAAACCACATACTCCACCGCTGTGCGGGCCCCCGTCAATTCC<br>TTTGAGTTTCACACTTTCGCTGCTACTTCCCGAGGCGGGATACTTAACGCGTAGCTACGGCAGCGCTTGGGTCGATACAAGCCACACCTAGTATCCCATCGTTTACGGCTAGGACTACTGGGGGTATCTAATCCCATTTTCGCTCCCCC<br>TAGCTTTTCGTACCCCTCAGTGTTCAGTTTTTCGGCCCTGGGACGGGACGGCTTCGCTGCTGGGTGTTTCTTCCCGATATCTACGCAATTCACCGCTACACCCGGGGAATTTCCCTCCCTGCCCTTAACCGTTACTCTTGGCCCAATCA<br>GTTTTTCTACCTACCTTCCCGAGAAGTTAAGCCCTGGGTCCTTTAAATAGGCAAGAAGTTTGGATTAGGCCACCC                                                                                                                                                                                                     | 828             | [SUB6417163]<br>16S_ITAC_106<br>MN581061 |
| ITAC102  | >16S_ITAC_102<br>CTGTCTCTGCGATTACTAGCGATTCCTAATTCCGCACGCGAGTTGCAGCCTGCGATCTGAACTGTGCTAGGGTTTATGGGATTAGCGCGCTTCGCAGGTTGGCTGCCCTTGTCCGAACATTGTAGTACGTGTGTAGCCGAAAGCTAA<br>GGGGCATGATGACTTGACGTCATCCACACCTTCTCCGTTTGTGCCCCGCGAGTCTCTAGAGTGCCCAACTTAATGCTGGCAACTAAAAACGTGGGTTGCGCTCGTTGCGGGACTTAACCCAACATCTCACGACAGAGCTGACGACA<br>GCCATGCACCACCTGTGTTTCGCGTTCCCGAAGGCACCTCCTACTTTCATTGGGATTGCGGACATGTCAAGCCCTGGTAAGGTTCTTCGCGTTGCATCGAATTAACCCACATACTCCACCGCTTGTGCGGGCCCCCGTCAATTCTTTAG<br>TTTACCACTTTCGCTGCGTACTCTCCCGAGGCGGGGATACTTATCGCGTTAGCTACGGTACTGCTTGGGTCGATACACGCAACACCTAGTATCCATCGTTTACAGCTAGGACTACAGGGGGTATCTAAATCCCATTTCGCTCCCCCTAGCT<br>TTCGTA                                                                                                                                                                                                                                                                                                                                                                                                                                      | 606             | [SUB6416885]<br>16S_ITAC_102<br>MN581058 |
| ITAC103  | >16S_ITAC_103<br>GTATGTCTGTGGATTGTAAACCTCTTTTCTCTAGGAAGAAGATCTGACGGTACTAGAGGAATCAGCATCGGCTAACTCCGTGCCAGCAGCCGCGGTAAGACGGAGGATGCAAGCGTTATCCGGAATTATTGGGCGTAAAGCGTCCGTAGG<br>CGGTTAGTTAAGTCAGTTGTTAAAGACTACAGCTCAACTGTGGGAGAGCAACTGAACTGATTGACTAGATAGTTAGGGGTAGAGGGAATTCCTAGTGTAGCGGTGAAATGCGTAGATATTAGGAAGAACACCACTGCGCAAGGCGCT<br>CTGCTGGGCCAAGACTGACGCTGATGGACGAAAGCTAGGGGAGCGAAAGGGATTAGATACCCCTGTAGTCTTAGCTGTAACAGTGGATACTAGGTGTTGTGCGTATGACCCGTCGAGTACCAGCAAGAACCGGTTAAGTATCCCGCT<br>GGGGAGTAGCGACGCAAGTGTGAACTCAAAGGAATTGACGGGGGCCCGCACAAGCGGTGGAGTATGTGTTTAATTTCGATGCAACGCGAAGAACCTTACCAGGACTTGACATCCCTTGAATTTTCCAGAAATGGATTAGTGCTTCGGG<br>AGCAAGGAGACAGGTGGTGCATGCTGCTGAGTGTGGGTTAAGTCCCGCAACGAGCGCAACCCACGTTTTCAGTTGCCATCTCAGTTGGGCACCTTGGAGAGACTGCCGGGGACAACCTCGGAGGAAGGTGT<br>GGACGACGTCGAAGTCATCATGCCCTTACGTTCTGGGCTACACAGCTACTACAATGCAACGGAAGGGAGCCAACTGAGCATAGTGAAGCTAATCCCATAAACCGTTGCCAGTTCAGATTGCAAGGTGCAACTCGCTGCATGAAGG<br>AGGAATCGCTAGTA                                                                                                                                   | 914             | [SUB6416938]<br>16S_ITAC_103<br>MN581055 |
| ITAC105  | >16S_ITAC_105<br>AGCCGCGGTAAGACGGAGGATGCAAGCGTTATCCGGAATTATTGGGCGTAAAGCGTCCGTAGGCGGTTTATCAAGTCTGCCGTTAAAGACTGACAGCTTAACTGTGGGCGAGCGGTGGAAGCTGATTAAGTGTGGTAGGGGTAGAG<br>GGAAATCCCAAGTGTAGCGGTGAAATGCGTAGATATTGGGAAGAACACCACTGAGGCGAAGGCGCTCTACTGGGCCACAACCTGAGCGTGAAGGACGAAAGCTAGGGGAGCGAAAGGGATTAGATACCCCTGTAGTCTAGCTGTAAACGATGG<br>ATACTAGGTGTTGCGCGTATCGACCCGTGCAGTACCGTAGCCAACGCGATAAGTATCCCGCTTGGGAGTAGCGACGCAAGTGTGAAACTCAAAGGAATTGACGGGGGCCCGCACAAGCGGTGGAGTATGTGTTTAATTTCGATGCAACG<br>CGAAGAACCTTACCAGGGCTTGACATCCCGCGAATCTTGATGAAAGTCGAGAGTGCCCTTCGGGAACGCGGAGACAGGTGGTGCATGGCTGTCGTCAGCTCGTGTCTGAGATGTTGGGTTAAGTCCCGCAACGAGCGCAACCCACGTCCT<br>TAGTTGCCAGCATTAAGTTGGGCACCTCTGGGAGAGCTGCCGGGGACAACCTCGGAGGAAGGTGTGGATGACGTCAAGTCATCATGCCCTTACGTTCTGGGCTACACAGTACTACAATGCTTCGGACAAAGGGCAGCGAACCTGCGAAAGG<br>CAAGCTAATCCCAATAACCGAGGCACAGTTAGATTGCAAGCTGCAACTCGCTGCATGAAGGTAGGAATCGTAGTATCGCAGGTCACGATATGCGG                                                                                                                                                                             | 849             | [SUB6416967]<br>16S_ITAC_105<br>MN581059 |
| ITAC104  | >16S_ITAC_104<br>GACGGCCTGTGGGTTGTAAACCGCTTTTCTCAGGGAAGAAGATCTGACGGTACCTGAGGAATCAGCATCGGCTAACTCCGTGCCAGCAGCCGCGGTAATACGGAGGATGCAAGCGTTATCCGGAATTATTGGGCGTAAAGCGTCCGAG<br>GCGGCTTATCAAGTCTGCTGTGTTAAATGTGCGGGCTCAACTCCGATTGCGAGTGGAAACTGATAGGCTAGAGTACGGTAGGGGTAGAGGGAATTCAGTGTAGCGGTGAAATGCGTAGATATTGGGAAGAACACCACTGAGCGAAGGCGC<br>TCTACTGGCCGTAAGTACGCTGAGGGACGAAAGCTAGGGGAGCGAAAGGGATTAGATACCCCTGTAGTCTAGCTGTAAACGATGGACACTAGGTGTTGGCCGATCGACCCGGTCAGTATCGTAGTCAACGCGTTAAGTGTCCCGC<br>TGGGAGGTGCGACGCAAGTGTGAACTCAAAGGAATTGACGGGGGCCCGCACAAGCGGTGAGTATGTGTTTAATTTCGATGCAACGCGAAGAACCTTACGAGGTTTACGAGGTTTACGAGGTGCTTGGGAGTGTGAGAGTGCCTTCGG<br>GAGCGCGGAGACAGGTGGTGCATGGCTGTGTCGTCAGCTGCTGTCGTCGAGATGTTGGGTTAAGTCCCGCAACGAGCGCAACCCCTCGTTTTAGTTGCCATCATTAAGTTGGGCACTTCTAGAGAGACTGCCGGGGACAACCTCGGAGGAAGGT<br>GGGGATGACGTCAAGTCATCATGCCCTTACATCCTGGGCTACACACGTAACAATGCTACGGACAAGGGCAGCAAGGTGCGGAGAGCAAGCTAATCTCATAAACCGTGCTCAGTTGAGATCGAGGCTGCAACTCGCTGCGTGAA<br>GGAGGGAATCGCTAGTATTCGCACT                                                                                                     | 926             | [SUB6416339]<br>16S_ITAC_104<br>MN581060 |
| ITAC101  | >GU220365.1 Halomicronema metazoicum ITAC101 16S ribosomal RNA gene, partial sequence<br>CGAAAGCTGACGGAGCAACGCCGCGTGCGGGATGACGGCTGTGGGTTGTAAACCGCTTTTCTCAGGGAAGAAGATCTGACGGTACTGAGGAATCAGCATCGGCTAACTCCGTGCCAGCAGCCGCGTAATACGGAGGATGCAAGCGT<br>TATCCGGAATTATTGGGCGTAAAGCGTCCGCAGGCGGCTTATCAAGTCTGCTGTTAAATGTGAGTATGCTTAAATGTGCAAGCGGGAAGCTTACGAGGTTAGAGTACGGTAGGGGTAGAGGGAATTCACAGTGTAGCGGTGAAATGCGT<br>AGATATTGGGAAGAACACCACTGGCGAAGGCGCTCTACTGGGCCGTAAGTACGCTGAGGACGAAAGCTAGGGGAGCGAAAGGGATTAGATACCCCTGTAGTCTTAGCTGTAACAGTGGACACTAGGTGTTGGCCGTATCGACCCGGT<br>CAGTATCGTAGCTTAACGCGTTAAGTGTCCCGCTGGGGAGTAGCGACGCAAGTGTGAAACTCAAAGGAATTGACGGGGGCCCGCACAAGCGGTGGAGTATGTGTTTAATTTCGATGCAACGCGAAGAACCTTACGAGGTTTGCATCCCC<br>GCGAATCTTGATGAAAGTTGAGAGTGCCTTCGGGAGCGGAGACAGGTGGTGCATGGCTGTGTCAGCTCGTGTGTCGAGATGTTGGGTTAAGTCCCGCAACGAGCGCAACCCCTCGTTTTAGTTGCCATCATTAAGTTGGGCACTTCTAGAGAGACTGCCGGGGACAACCTCGGAGGAAGGT<br>GGGGATGACGTCAAGTCATCATGCCCTTACATCCTGGGCTACACACGTAACAATGCTACGGACAAGGGCAGCAAGGTGCGGAGAGCAAGCTAATCTCATAAACCGTGCTCAGTTGAGATCGAGGCTGCAACTCGCTGCGTGAA<br>GGAGGGAATCGCTAGTATTCGCACT | 990             | GU220365.1                               |
